# Supplementary material for: Geographic Range Overlap Rather Than Phylogenetic Distance Explains Rabies Virus Transmission Among Closely Related Bat Species
Source: Preprints.org preprint supplement (doi:10.20944/preprints202210.0151.v1), 2022-10-11
Supplement: Supplementary file 1 [file TableS1.xlsx]

## Sheet: Sheet1
Table S1. Rabies virus samples used in this study
Sample designation	Date of sample submission			Host species	Host species cluster	RABV Variant (if assigned)	Owner City/ State if City Unknown	Province or State	Genbank Accession No.
	Year	Month	Day
01FL1078AUS	2001			Myotis austroparius (AUSB)	AUSB	-	FLORIDA	FL	JQ685921
01FL331AUS	2001			Myotis austroparius (AUSB)	AUSB	-	FLORIDA	FL	GU644742
88FL876AUS	1998			Myotis austroparius (AUSB)	AUSB	-	FLORIDA	FL	AY039225
02BC0604CL	2002	Jun	17	Myotis californicus (CLB)	CLB/ESB/WSB	MY-WEST1	OLIVER	BC	KY203074
03BC1435CL	2003	Oct	20	Myotis californicus (CLB)	CLB/ESB/WSB	CL	WESTBANK	BC	KY203088
04WA1502CL	2004			Myotis californicus (CLB)	CLB/ESB/WSB	-	FLORIDA	FL	GU644745
05BC0708CL	2005	Jul	14	Myotis californicus (CLB)	CLB/ESB/WSB	CL	BRACKENDALE	BC	KY203100
05BC0713CL	2005	Jul	15	Myotis californicus (CLB)	CLB/ESB/WSB	CL	KELOWNA	BC	KY203101
05BC0983CL	2005	Aug	24	Myotis californicus (CLB)	CLB/ESB/WSB	LE-1	SUMMERLAND	BC	KY203103
05BC1063CL	2005	Sep	1	Myotis californicus (CLB)	CLB/ESB/WSB	MY-WEST1	KEREMEOS	BC	KY203106
05ID7198CL	2005			Myotis californicus (CLB)	CLB/ESB/WSB	-	WASHINGTON	WA	GU644743
05ID7261CL	2005			Myotis californicus (CLB)	CLB/ESB/WSB	-	IDAHO	ID	GU644744
06BC0652CL	2006	Jul	7	Myotis californicus (CLB)	CLB/ESB/WSB	CL	KELOWNA	BC	KY203110
06BC1209CL	2006	Oct	17	Myotis californicus (CLB)	CLB/ESB/WSB	CL	COOMBS	BC	KY203113
07BC0330CL	2007	Apr	25	Myotis californicus (CLB)	CLB/ESB/WSB	CL	VICTORIA	BC	KY203120
08BC0971CL	2008	Aug	20	Myotis californicus (CLB)	CLB/ESB/WSB	CL	SOOKE	BC	KY203136
08BC1005CL	2008	Aug	26	Myotis californicus (CLB)	CLB/ESB/WSB	CL	MUDGE ISLAND	BC	KY203137
08BC1091CL	2008	Sep	4	Myotis californicus (CLB)	CLB/ESB/WSB	CL	EAST SOOKE	BC	KY203138
10BC1102CL	2010	Oct	26	Myotis californicus (CLB)	CLB/ESB/WSB	CL	GARIBALDI HIGHLANDS	BC	KY203150
13BC0933CL	2013	Oct	8	Myotis californicus (CLB)	CLB/ESB/WSB	CL	VANCOUVER	BC	KY203174
13BC0957CL	2013	Oct	8	Myotis californicus (CLB)	CLB/ESB/WSB	CL	GRAND FORKS	BC	KY203175
86CA1563CL	1986			Myotis californicus (CLB)	CLB/ESB/WSB	-	IDAHO	ID	AF394873
87CA1566CL	1987			Myotis californicus (CLB)	CLB/ESB/WSB	-	CALIFORNIA	CA	AF394871
92BC2520CL	1992	Oct	15	Myotis californicus (CLB)	CLB/ESB/WSB	CL	KASLO	BC	AF351836
93BC2391CL	1993	Sep	22	Myotis californicus (CLB)	CLB/ESB/WSB	CL	LANTZVILLE	BC	AF352649
95WA2847CL	1995			Myotis californicus (CLB)	CLB/ESB/WSB	-	CALIFORNIA	CA	AF394872
96BC1737CL	1996	Oct	22	Myotis californicus (CLB)	CLB/ESB/WSB	CL	MERVILLE	BC	KY203051
15AB0782WS	2015	Nov	27	Myotis ciliolabrum (WSB)	CLB/ESB/WSB	MY-WEST1	DRUMHELLER	AB	KY203181
00BC1396LE	2000	Jul	20	Myotis evotis (LEB)	KEB/LEB	LE-1	VERNON	BC	KY203062
00BC1948LE	2000	Sep	20	Myotis evotis (LEB)	KEB/LEB	LE-1	OKANAGAN FALLS	BC	KY203064
02BC0687LE	2002	Jun	28	Myotis evotis (LEB)	KEB/LEB	LE-1	DELTA	BC	KY203075
02BC1055LE	2002	Aug	15	Myotis evotis (LEB)	KEB/LEB	LE-1	SORRENTO	BC	KY203077
03BC0798LE	2003	Jul	25	Myotis evotis (LEB)	KEB/LEB	LE-1	100 MILE HOUSE	BC	KY203084
03BC1088LE	2003	Aug	21	Myotis evotis (LEB)	KEB/LEB	LE-1	KELOWNA	BC	KY203087
04BC1219LE	2004	Sep	20	Myotis evotis (LEB)	KEB/LEB	MY-WEST2	FOREST GROVE	BC	KY203095
05BC0984LE	2005	Aug	24	Myotis evotis (LEB)	KEB/LEB	LE-1	PENTICTON	BC	KY203104
05BC1062LE	2005	Sep	1	Myotis evotis (LEB)	KEB/LEB	LE-1	CRESTON	BC	KY203105
05ID7233LE	2005			Myotis evotis (LEB)	KEB/LEB	-	WASHINGTON	WA	GU644746
07BC0843LE	2007	Aug	2	Myotis evotis (LEB)	KEB/LEB	LE-1	LANGLEY	BC	KY203122
08BC1182LE	2008	Sep	10	Myotis evotis (LEB)	KEB/LEB	LE-1	KEREMEOS	BC	KY203139
09BC0661LE	2009	Aug	7	Myotis evotis (LEB)	KEB/LEB	LE-2	MERRITT	BC	KY203143
11BC0626LE	2011	Aug	14	Myotis evotis (LEB)	KEB/LEB	LE-2	OLIVER	BC	KY203156
11BC0768LE	2011	Sep	21	Myotis evotis (LEB)	KEB/LEB	LE-1	PEACHLAND	BC	KY203158
12BC0651LE	2012	Aug	17	Myotis evotis (LEB)	KEB/LEB	LE-2	CRANBROOK	BC	KY203166
15BC0324LE	2015	Jul	8	Myotis evotis (LEB)	KEB/LEB	MY-CENTRAL	CHETWYND	BC	KY203182
90CA1261LE	1990			Myotis evotis (LEB)	KEB/LEB	-	CALIFORNIA	CA	AF394874
91BC2029LE	1991	Sep	14	Myotis evotis (LEB)	KEB/LEB	LE-2	FRUITVALE	BC	AF352651
93BC2012LE	1993	Aug	24	Myotis evotis (LEB)	KEB/LEB	MY-WEST2	MCLEESE LAKE	BC	KY203042
94BC1295LE	1994	Jul	22	Myotis evotis (LEB)	KEB/LEB	LE-1	VERNON	BC	KY203045
97BC1234LE	1997	Aug	21	Myotis evotis (LEB)	KEB/LEB	LE-1	VERNON	BC	KY203053
97BC1309LE	1997	Aug	28	Myotis evotis (LEB)	KEB/LEB	LE-1	KELOWNA	BC	KY203054
98BC0885LE	1998	Jun	15	Myotis evotis (LEB)	KEB/LEB	LE-1	VERNON	BC	KY203055
98BC1632LE	1998	Aug	28	Myotis evotis (LEB)	KEB/LEB	LE-1	VERNON	BC	KY203056
98BC1797LE	1998	Sep	16	Myotis evotis (LEB)	KEB/LEB	LE-2	CRANBROOK	BC	KY203057
99BC1301LE	1999	Aug	4	Myotis evotis (LEB)	KEB/LEB	LE-2	CRANBROOK	BC	KY203059
99BC1631LE	1999	Sep	2	Myotis evotis (LEB)	KEB/LEB	LE-1	VERNON	BC	KY203060
01BC1373KE	2001	Aug	22	Myotis keenii (KEB)	KEB/LEB	KE	VICTORIA	BC	KY203068
02BC1354KE	2002	Sep	11	Myotis keenii (KEB)	KEB/LEB	KE	MAPLE RIDGE	BC	KY203078
03BC0671KE	2003	Jul	3	Myotis keenii (KEB)	KEB/LEB	KE	NORTH COWICHAN	BC	KY203082
05WA2020KE	2005			Myotis keenii (KEB)	KEB/LEB	-	WASHINGTON	WA	GU644747
06BC0750KE	2006	Jul	25	Myotis keenii (KEB)	KEB/LEB	CL	PORT COQUITLAM	BC	KY203111
07BC0993KE	2007	Aug	26	Myotis keenii (KEB)	KEB/LEB	LE-1	CHILLIWACK	BC	KY203123
07BC1028KE	2007	Aug	29	Myotis keenii (KEB)	KEB/LEB	CL	GIBSONS	BC	KY203125
07BC1118KE	2007	Sep	11	Myotis keenii (KEB)	KEB/LEB	LE-1	HARRISON HOT SPRINGS	BC	KY203127
12BC0623LB	2012	Aug	14	Myotis lucifugus (LBB)	LBB	YU	LANTZVILLE	BC	KY203165
13BC0579LB	2013	Jul	17	Myotis lucifugus (LBB)	LBB	YU	PORT ALBERNI	BC	KY203173
03ON8135ES	2003	Sep	17	Myotis leibii (ESB)	CLB/ESB/WSB	NL-EAST	BURLINGTON	ON	KY203091
01BC1239LB	2001	Aug	3	Myotis lucifugus (LBB)	LBB	YU	COURTENAY	BC	KY203067
03NB5753LB	2003	Jul	17	Myotis lucifugus (LBB)	LBB	NL-EAST	JUNIPER	NB	KY203089
03QC5215LB	2003	Jun	27	Myotis lucifugus (LBB)	LBB	NL-EAST	SAINT-LUDGER-DE-BEAUCE	QC	KY203093
04NL7456LB	2004	Sep	20	Myotis lucifugus (LBB)	LBB	MY-EAST	CARTWRIGHT	NL	KY203096
04ON4908LB	2004			Myotis lucifugus (LBB)	LBB	LB-EAST	COURTICE	ON	KY203098
04ON7188LB	2004	Sep	8	Myotis lucifugus (LBB)	LBB	LB-EAST	MISSISSAUGA	ON	KY203099
05MI1367LB	2005			Myotis lucifugus (LBB)	LBB	-	MISSISSIPI	MI	GU644749
05QC3806LB	2005	Aug	11	Myotis lucifugus (LBB)	LBB	NL-EAST	SHERBROOKE	QC	KY203108
06BC0997LB	2006			Myotis lucifugus (LBB)	LBB	YU	COQUITLAM	BC	KY203112
06ON2663LB	2006	Jul	5	Myotis lucifugus (LBB)	LBB	LB-EAST	BUCKHORN	ON	KY203115
06ON2973LB	2006	Jul	18	Myotis lucifugus (LBB)	LBB	LB-EAST	SAUBLE BEACH	ON	KY203116
06ON3971LB	2006	Aug	10	Myotis lucifugus (LBB)	LBB	LB-EAST	WIARTON	ON	KY203117
06ON4285LB	2006	Aug	18	Myotis lucifugus (LBB)	LBB	LB-EAST	FOOTES BAY	ON	KY203118
07ON2988LB	2007	Jun	26	Myotis lucifugus (LBB)	LBB	LB-EAST	RAMARA	ON	KY203129
07ON3514LB	2007	Jul	20	Myotis lucifugus (LBB)	LBB	LB-EAST	ESPANOLA	ON	KY203130
07ON4666LB	2007	Aug	15	Myotis lucifugus (LBB)	LBB	LB-EAST	ELLIOT LAKE	ON	KY203131
07ON5656LB	2007	Sep	19	Myotis lucifugus (LBB)	LBB	LB-EAST	TOBERMORY	ON	KY203132
08BC0743LB	2008	Jul	15	Myotis lucifugus (LBB)	LBB	YU	NANAIMO REGIONAL DISTRICT	BC	KY203134
08ON4543LB	2008	Sep	5	Myotis lucifugus (LBB)	LBB	LB-EAST	KINGSTON	ON	KY203140
09ON3049LB	2009	Aug	25	Myotis lucifugus (LBB)	LBB	LB-EAST	SAUBLE BEACH	ON	KY203144
10BC0916LB	2010	Sep	16	Myotis lucifugus (LBB)	LBB	YU	THETIS ISLAND	BC	KY203148
10ON1033LB	2010	May	18	Myotis lucifugus (LBB)	LBB	LB-EAST	WATERFORD	ON	KY203153
10ON2237LB	2010	Aug	10	Myotis lucifugus (LBB)	LBB	LB-EAST	WASHAGO	ON	KY203154
11BC0633LB	2011	Aug	16	Myotis lucifugus (LBB)	LBB	YU	HARRISON HOT SPRINGS	BC	KY203157
11ON2324LB	2011	Aug	26	Myotis lucifugus (LBB)	LBB	LB-EAST	ESPANOLA	ON	KY203160
12ON2326LB	2012	Sep	11	Myotis lucifugus (LBB)	LBB	LB-EAST	LITTLE CURRENT	ON	KY203170
13ON1646LB	2013	Aug	29	Myotis lucifugus (LBB)	LBB	LB-East	HAMILTON	ON	KY203172
15SK0644LB	2015	Sep	17	Myotis lucifugus (LBB)	LBB	MY-CENTRAL	GREIG LAKE	SK	KY203186
93BC2414LB	1993	Sep	24	Myotis lucifugus (LBB)	LBB	CL	CAMPBELL RIVER	BC	AF352643
97AB1317LB	1997	Aug	28	Myotis lucifugus (LBB)	LBB	MY-WEST1	MEDICINE HAT	AB	KY203052
00NS4136NL	2000	Aug	29	Myotis septentrionalis (NLB)	NLB	NL-EAST	KENTVILLE	NS	KY203066
01NB9133NL	2001	Aug	22	Myotis septentrionalis (NLB)	NLB	NL-EAST	MADAWASKA COUNTY	NB	KY203069
02ON7141NL	2002	Oct	4	Myotis septentrionalis (NLB)	NLB	NL-EAST	SHANTY BAY	ON	KY203079
02QC5465NL	2002	Aug	16	Myotis septentrionalis (NLB)	NLB	NL-EAST	SAINTE-MARIE	QC	KY203080
04ON1384NL	2004	Oct	20	Myotis septentrionalis (NLB)	NLB	MY-CENTRAL	THUNDER BAY DISTRICT	ON	KY203097
07QC4705NL	2007	Aug	16	Myotis septentrionalis (NLB)	NLB	NL-EAST	BEAUX-RIVAGES	QC	KY203133
09PE3479NL	2009	Sep	22	Myotis septentrionalis (NLB)	NLB	NL-EAST	CHARLOTTETOWN	PE	KY203145
10NS2054NL	2010	Jul	30	Myotis septentrionalis (NLB)	NLB	NL-EAST	STEWIACKE	NS	KY203151
11QC2462NL	2011	Sep	7	Myotis septentrionalis (NLB)	NLB	NL-EAST	SAINT-PHILIBERT	QC	KY203161
95SK1274NL	1995	Aug	24	Myotis septentrionalis (NLB)	NLB	MY-CENTRAL	PORCUPINE PLAIN	SK	KY203049
96ON3694NL	1996	Aug	9	Myotis septentrionalis (NLB)	NLB	NL-EAST	ORLEANS	ON	AF352653
08BC0783LL	2008	Jul	22	Myotis volans (LLB)	LLB	LE-1	NANAIMO	BC	KY203135
00BC2103YU	2000	Oct	17	Myotis yumanensis (YUB)	YUB	YU	KINGCOME INLET	BC	KY203065
02BC1048YU	2002	Aug	15	Myotis yumanensis (YUB)	YUB	YU	SARDIS	BC	KY203076
04AZ2857YU	2004			Myotis yumanensis (YUB)	YUB	-	ARIZONA	AZ	GU644751
04CA828YU	2004			Myotis yumanensis (YUB)	YUB	-	CALIFORNIA	CA	GU644752
04CA957YU	2004			Myotis yumanensis (YUB)	YUB	-	CALIFORNIA	CA	GU644753
07BC0711YU	2007	Jul	17	Myotis yumanensis (YUB)	YUB	YU	ANMORE	BC	KY203121
07BC1002YU	2007	Aug	28	Myotis yumanensis (YUB)	YUB	YU	COURTENAY	BC	KY203124
07BC1071YU	2007	Sep	5	Myotis yumanensis (YUB)	YUB	YU	CORTES ISLAND	BC	KY203126
09BC0504YU	2009	Jul	3	Myotis yumanensis (YUB)	YUB	YU	LANGLEY	BC	KY203142
10BC0420YU	2010	Jun	22	Myotis yumanensis (YUB)	YUB	YU	ABBOTSFORD	BC	KY203147
11BC0359YU	2011	Jun	14	Myotis yumanensis (YUB)	YUB	CL	DUNCAN	BC	KY203155
12BC0581YU	2012	Aug	2	Myotis yumanensis (YUB)	YUB	YU	TAPPEN	BC	KY203162
12BC0614YU	2012	Aug	10	Myotis yumanensis (YUB)	YUB	YU	MAPLE RIDGE	BC	KY203164
12BC0707YU	2012	Aug	31	Myotis yumanensis (YUB)	YUB	LE-2	APPLEDALE	BC	KY203167
12BC0803YU	2012	Sep	28	Myotis yumanensis (YUB)	YUB	YU	NANAIMO	BC	KY203169
14BC0499YU	2014	Aug	19	Myotis yumanensis (YUB)	YUB	YU	NANAIMO	BC	KY203177
15BC0560YU	2015	Aug	28	Myotis yumanensis (YUB)	YUB	YU	VICTORIA	BC	KY203184
91BC1714YU	1991	Aug	14	Myotis yumanensis (YUB)	YUB	YU	KAMLOOPS	BC	AF352652
99BC0631YU	1999	May	21	Myotis yumanensis (YUB)	YUB	LE-1	VERNON	BC	KY203058
