# Supplementary material for: Geographic Range Overlap Rather Than Phylogenetic Distance Explains Rabies Virus Transmission Among Closely Related Bat Species
Source: Preprints.org preprint supplement (doi:10.20944/preprints202210.0151.v1), 2022-10-11
Supplement: Supplementary file 2 [file TableS2.xlsx]

## Sheet: Sheet1
Table S2. Table of morphological measurements used to compute the foraging niche predictor for each Myotis species in the analysis, along with the observed summer roost types used to compute the roosting niche overlap predictor.
Latin Species name	Common name	Wing Aspect Ratio	Wing Loading (g/cm2)	Body Length (mm)	Summer Roost Type	Literature Sources
M.austroriparius	South-eastern Myotis	6	0.067	83.7	tree hollow, man-made structures, cave	(Streicker et al. 2010b)
M.californicus	California bat	5.6	0.049	95	Tree bark, anmade structures, rock crevice	(Streicker et al. 2010b)
M.leibii	Eastern small footed bat	6.57	0.066	83	Caves, man-made structures (mines)	(Farney, John & Fleharty 1969;
						Norberg & Rayner 1987;
						Best & Jennings 1997)
M.keenii	Keens bat	5.8	0.069	94	Tree hollow, man-made structures	(Streicker et al. 2010b)
M.lucifugus	Little Brown Bat	6	0.076	102	Tree hollow, tree bark, man-made structures, cave, rock crevice	(Streicker et al. 2010b)
M.evotis	Western long-eared bat	6.31	0.059	88.8	Tree bark, rock crevice, tree hollows, cave, man-made structures	(Farney, John & Fleharty 1969;
						Norberg & Rayner 1987)
M.volans	Long-legged bat	6.22	0.082	95	tree hollow, rock crevice, tree bark, man-made structures	(Farney, John & Fleharty 1969;
						Warner & Czaplewski 1984;
						Norberg & Rayner 1987;
						Johnson et al. 2007)
M.septentrionalis	Northern long eared bat	6	0.067	95	tree hollow, tree bark, cave	(Streicker et al. 2010b)
M.ciliolabrum	Western small footed bat	6.55	0.66	84.9	rock crevice, cave, man-made structures, tree bark	(Farney, John & Fleharty 1969;
						Norberg & Rayner 1987;
						Constantine 1998)
						(www.iucnredlist.org/details/14153/0)
M.yumanensis	Yuma bat	6.3	0.08	84	Man-made structures, tree hollows	(Evelyn et al. 2004;
						Streicker et al. 2010b)
