# Supplementary material for: Geographic Range Overlap Rather Than Phylogenetic Distance Explains Rabies Virus Transmission Among Closely Related Bat Species
Source: Preprints.org preprint supplement (doi:10.20944/preprints202210.0151.v1), 2022-10-11
Supplement: Supplementary file 3 [file TableS3.xlsx]

## Sheet: Sheet1
Table S3. Posterior inclusion probabilities, Bayes factors and the mean conditional effect size (with upper and lower quantiles) for the 5 predictors of host shifts of RABV between clustered Myotis species.
Predictor	Inclusion Probabilities	Bayes Factors	mean Conditional effect size	lower Quantiles	upper Quantiles
Host species distance	0.00699844	0.0473964	-0.0573675	-0.551608	0.381958
Range Overlap	0.468674	5.93203	2.21305	0.481035	4.42574
Foraging niche difference	0.00622084	0.0699816	-0.00931143	-0.401761	0.591676
Roosting niche difference	0.00644301	0.0420972	0.149298	-0.198533	0.478346
Sample size	0.00766496	0.0436104	-0.166372	-0.547888	0.158644
