# Supplementary material for: Geographic Range Overlap Rather Than Phylogenetic Distance Explains Rabies Virus Transmission Among Closely Related Bat Species
Source: Preprints.org preprint supplement (doi:10.20944/preprints202210.0151.v1), 2022-10-11
Supplement: Supplementary file 4 [file TableS4.xlsx]

## Sheet: Sheet1
Table S4. Posterior inclusion probabilities, Bayes factor support and the mean conditional effect size for the 5 predictors of transitions in internal and external nodes of the Myotis bat RABV phylogeny
	Predictors	Inclusion Probability	Bayes Factors	Log conditional effect size	Lower quantiles	Upper quantiles
External	Genetic distance	0.0355477	0.24787	-0.0128735	-4.16342	3.50451
	Range overlap	0.0349922	0.243857	-0.0306137	-4.24735	3.7477
	Foraging niche difference	0.0383248	0.268007	0.0183347	-4.27161	3.90863
	Roosting niche overlap	0.0358809	0.25028	0.094872	-3.49065	4.21707
	SampleSize	0.032104	0.223061	0.115684	-3.61656	4.27275
Internal	Genetic distance	0.00810931	0.0549812	0.0804554	-0.281446	0.488663
	Range overlap	0.804044	27.594	1.59782	0.547607	2.98633
	Foraging niche difference	0.00955343	0.0648668	0.139208	-0.234131	0.542448
	Roosting niche overlap	0.00755388	0.0511867	-0.0524758	-0.464191	0.349399
	SampleSize	0.0139969	0.0954657	-0.243575	-0.667765	0.141944
