# Supplementary figures and images for: Geographic Range Overlap Rather Than Phylogenetic Distance Explains Rabies Virus Transmission Among Closely Related Bat Species
Source: Preprints.org preprint supplement (doi:10.20944/preprints202210.0151.v1), 2022-10-11

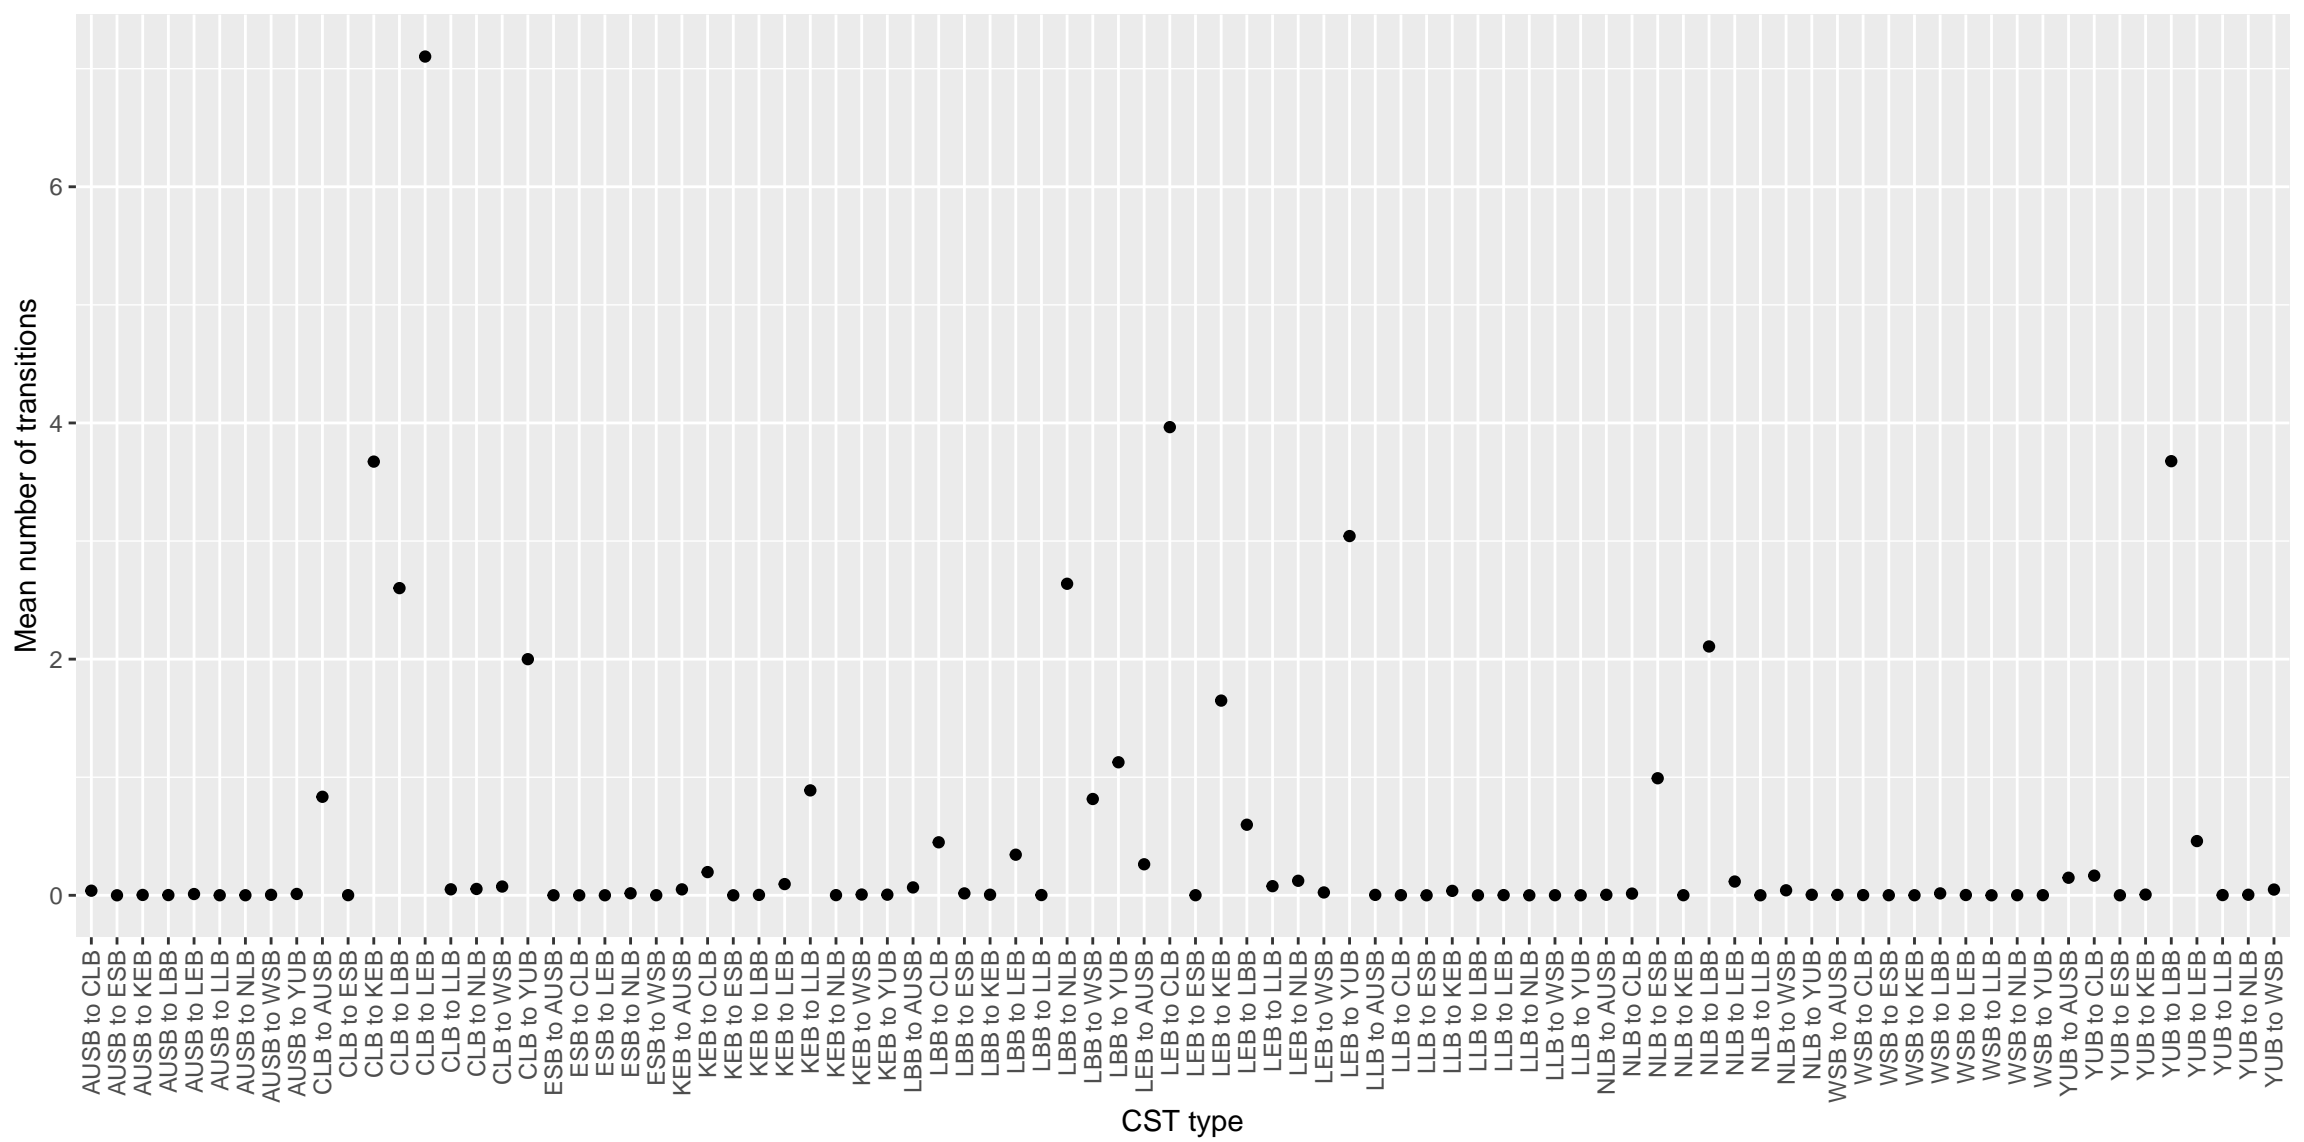

Supplement: Supplementary file 3 [file supplementary]

**A**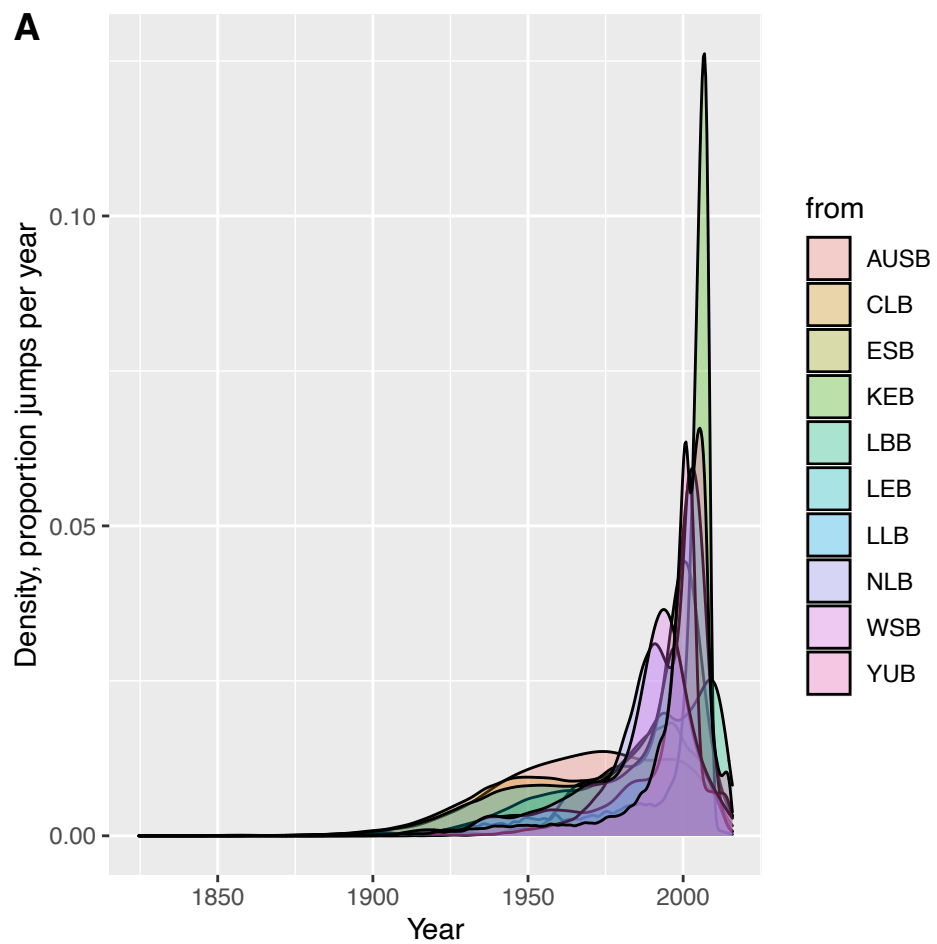**B**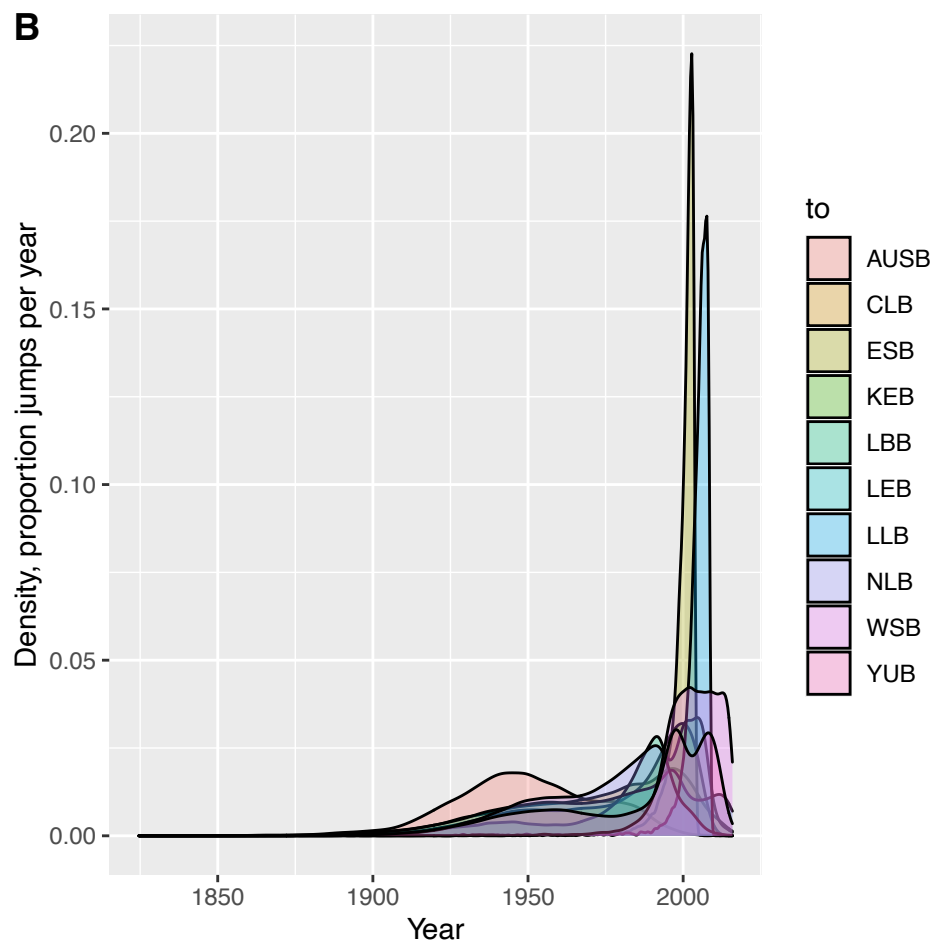

Supplement: Supplementary file 4 [file supplementary]
